# Supplementary material
Source: Springer Nature journal article supplement (https://www.springermedizin.de/resource/supplementary/12879_2009_1210_MOESM2_ESM.pdf/9442096)

(a) PHN1

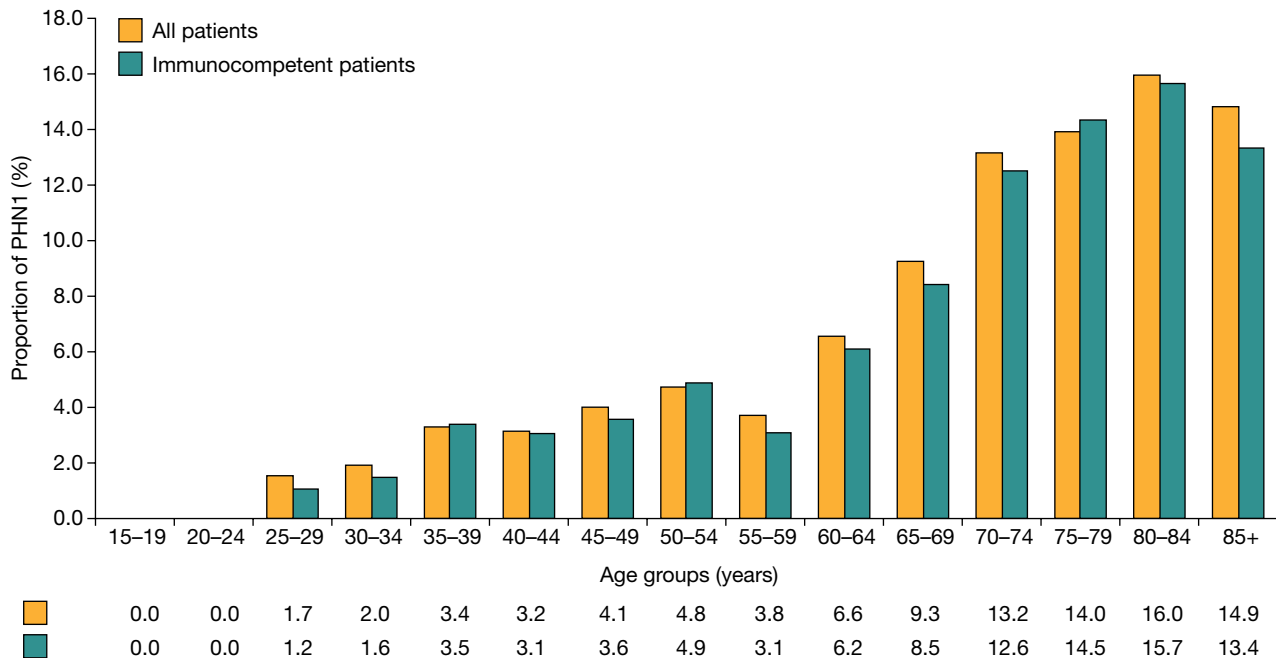

(b) PHN3

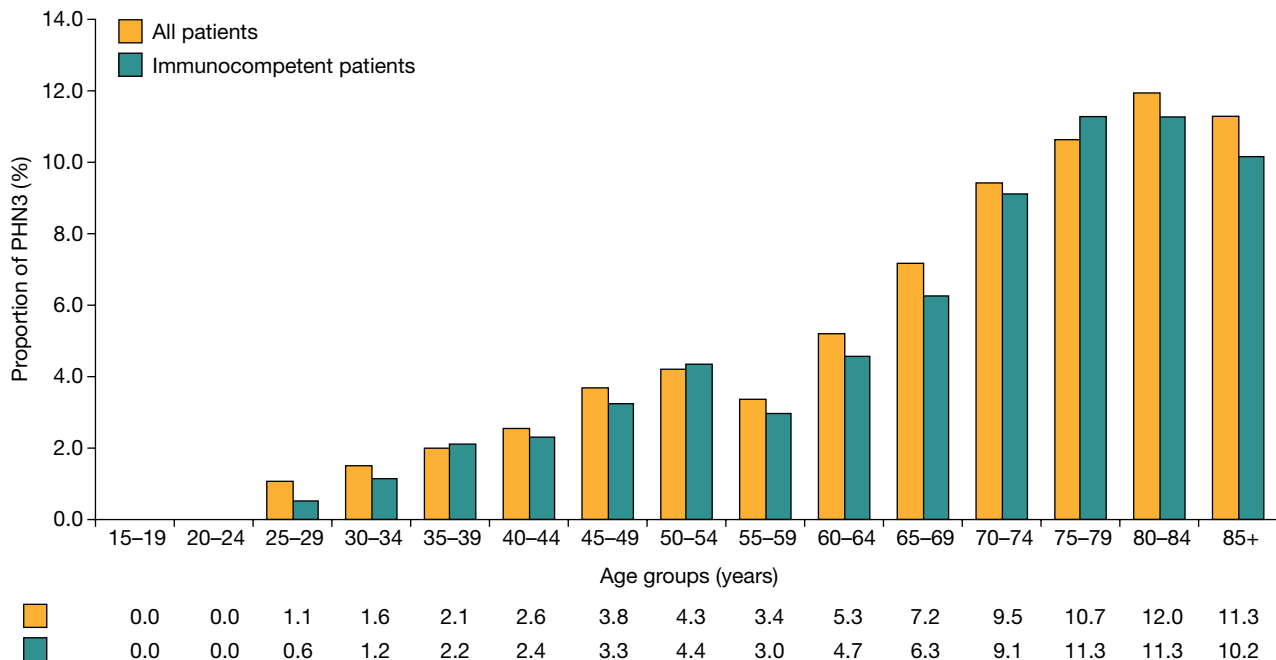

PHN = post-herpetic neuralgia

Supplement: MOESM2 [file 9442096]
